# Supplementary material
Source: PubMed Central journal article supplement (PMC4463201)
Supplement: JCI78863sd.pdf [file JCI78863sd.pdf]

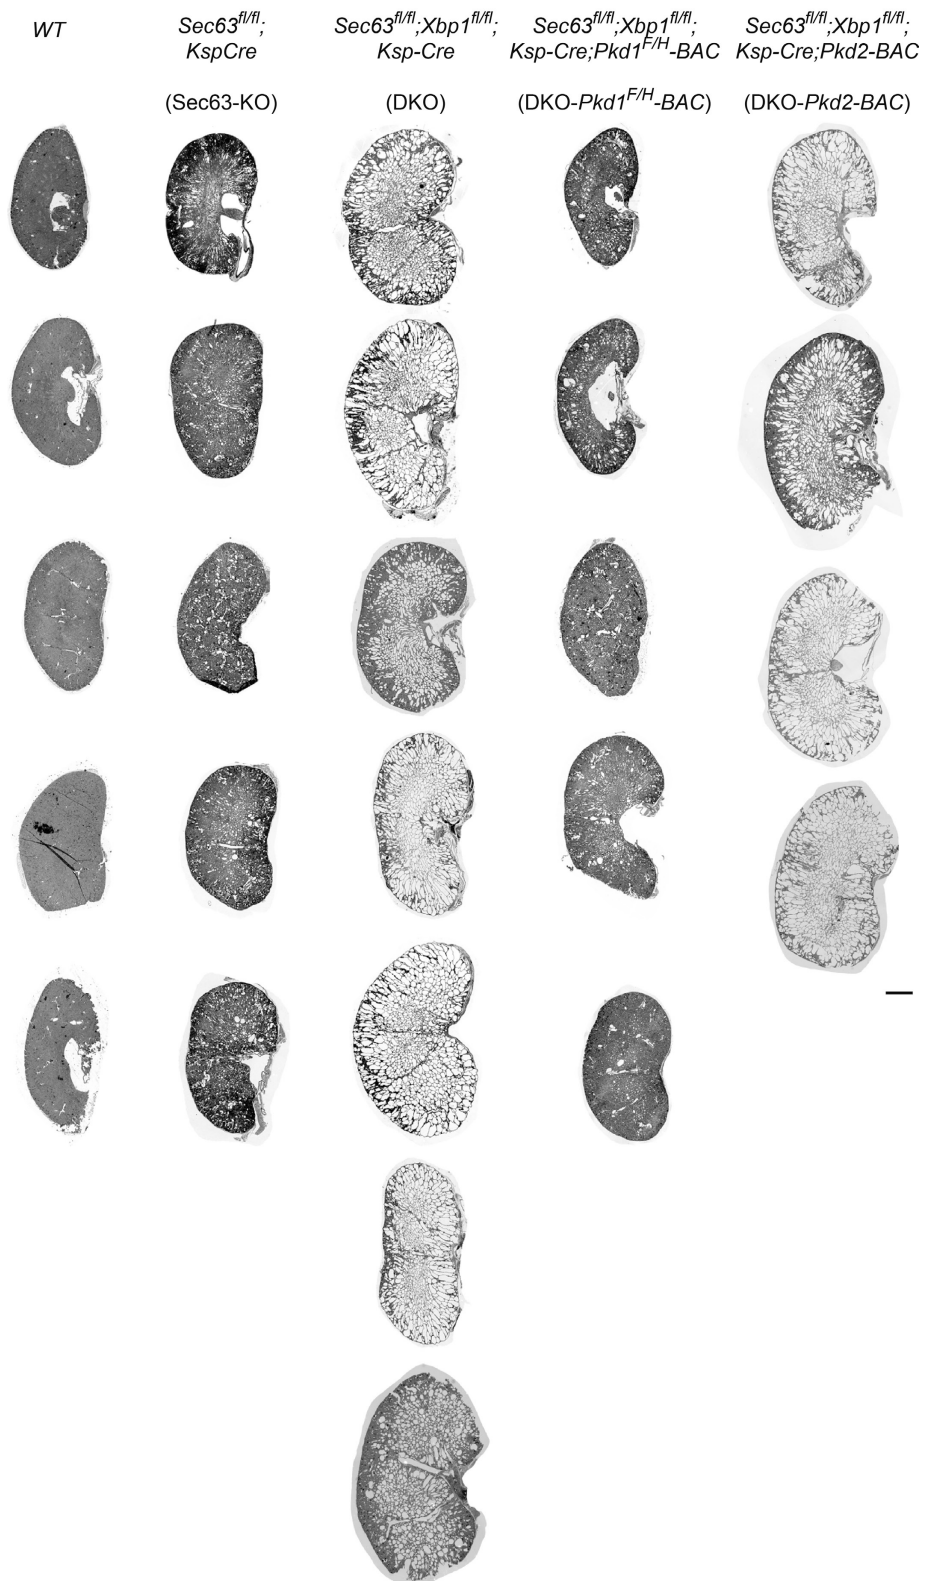

**Figure S1. Kidney sections stained with hematoxylin and eosin.** Images for all of the individual sections used in Figure 2C. Scale bar, 1 mm.

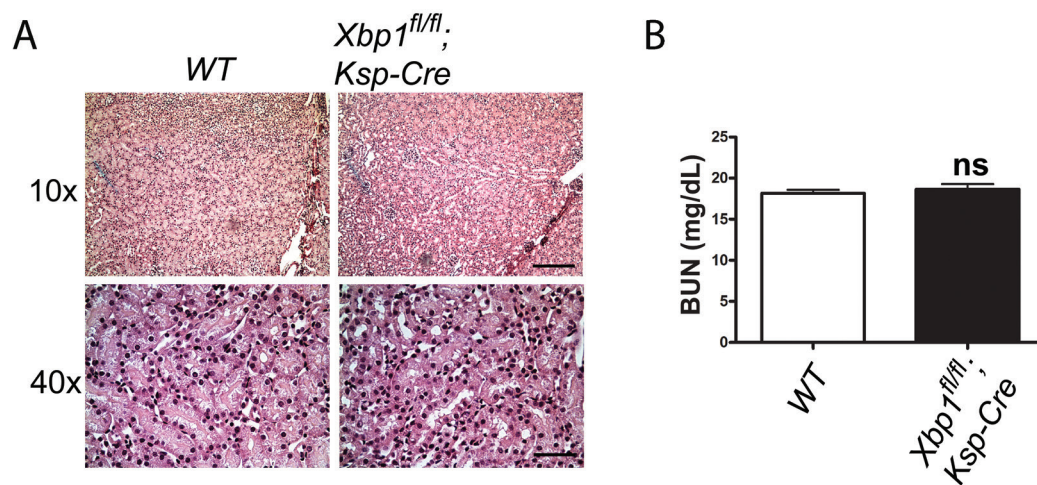

**Figure S2. Deletion of *Xbp1* using *Ksp-Cre* does not cause any morphological or functional defects in the kidney.** (A) Kidney sections from WT (*Xbp1<sup>fl/fl</sup>*) and XBP1 deficient (*Xbp1<sup>fl/fl</sup>;Ksp-Cre*) mice at 6 months of age were stained with hematoxylin and eosin. Scale bars, 500  $\mu$ m (10x); 100  $\mu$ m (40x). (B) Kidney function was assessed by BUN assay.  $n=3-4$ ;  $P=0.65$  (ns, not significant).

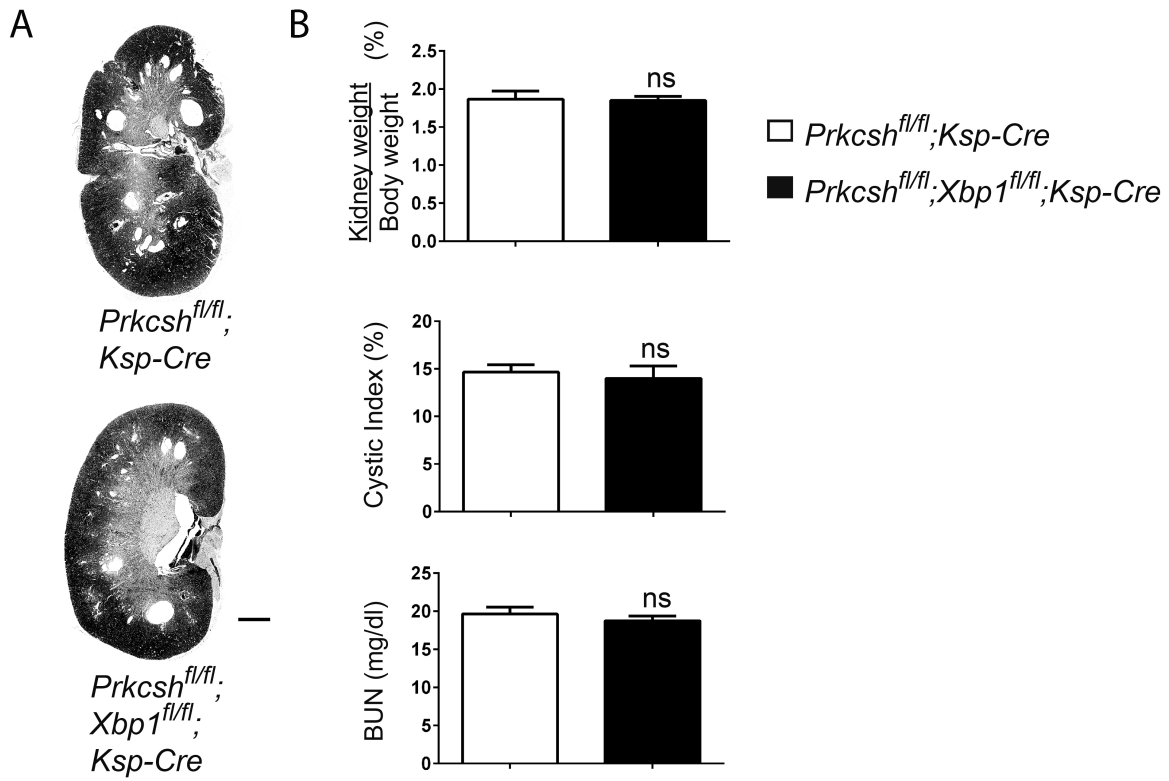

**Figure S3. Effects of concomitant inactivation of *Xbp1* and *Prcksh* on cyst formation. (A)** Representative kidney sections from *Prkcsh*-only and *Prkcsh/Xbp1*-double knockout kidneys at P42 showing no change in cyst severity. **(B)** Aggregate data showing no differences in kidney weight to body weight ratio, cystic index or BUN levels;  $n = 3-4$ .

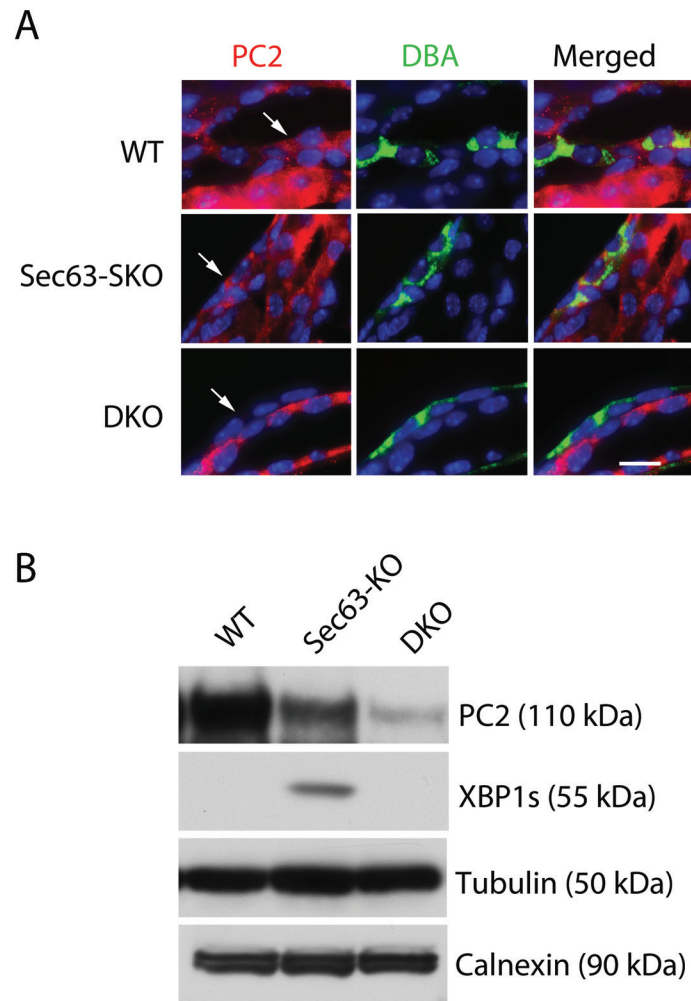

**Figure S4. Steady state PC2 levels are further decreased in DKO mouse kidneys. (A)** PC2 expression in collecting duct cyst lining cells (arrows) is progressively reduced in Sec63-KO and DKO tissues, respectively. PC2 detection by immunofluorescent staining using an anti-native PC2 antibody (YCC2). Scale bar, 5  $\mu$ m. **(B)** Progressive reduction of PC2 expression in the kidney tissue by genotype. Whole kidney lysates were subjected to immunoblotting analysis with anti-PC2 and anti-XBP1s antibodies. Tubulin and calnexin serve as loading controls.

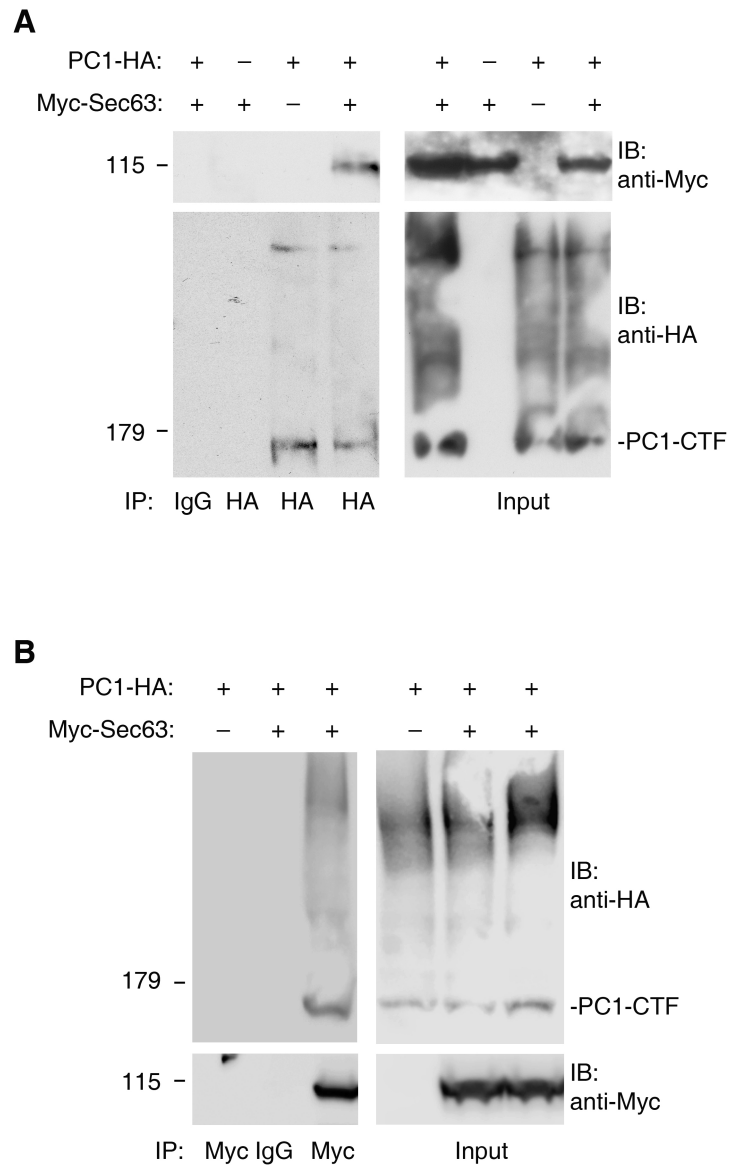

**Figure S5. Interaction between Sec63 and polycystin-1. (A)** HEK293T cells were co-transfected with PC1-HA and Myc-Sec63 plasmids as indicated. PC1 protein was immunoprecipitated (IP) using anti-HA antibody. PC1 and Sec63 proteins in immunoprecipitates and lysates were detected by immunoblotting (IB) with anti-HA and anti-Myc antibodies, respectively. **(B)** Immunoblotting was performed as indicated following immunoprecipitation of Sec63 using anti-Myc antibody.

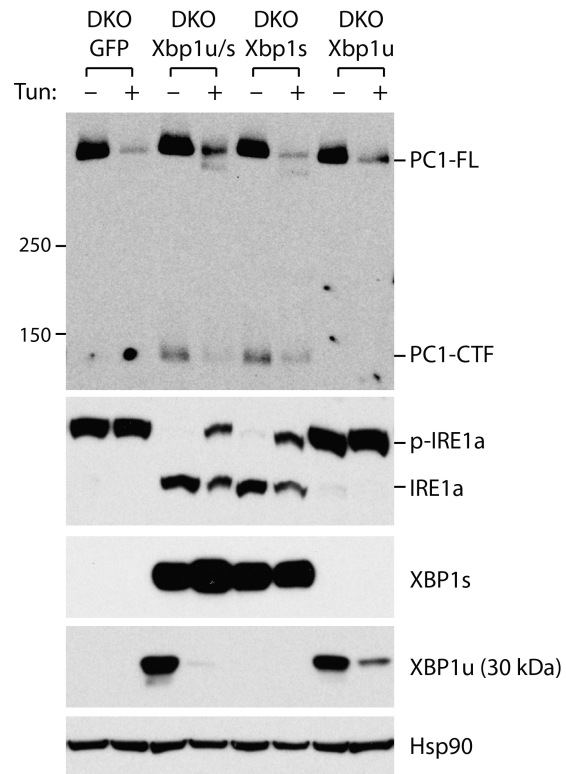

**Figure S6. PC1-CTF cleavage is induced in DKO-*Pkd1*<sup>F/H</sup>-BAC cells by XBP1s, but not by the mutant XBP1u that cannot be spliced by IRE1 $\alpha$ .** DKO-*Pkd1*<sup>F/H</sup>-BAC cells were retrovirally transduced with mouse XBP1u/s, XBP1u, and XBP1s. Cells were either unstressed or treated with tunicamycin (1  $\mu$ g/ml) for 6h, and subjected to immunoblotting analysis with indicated antibodies.

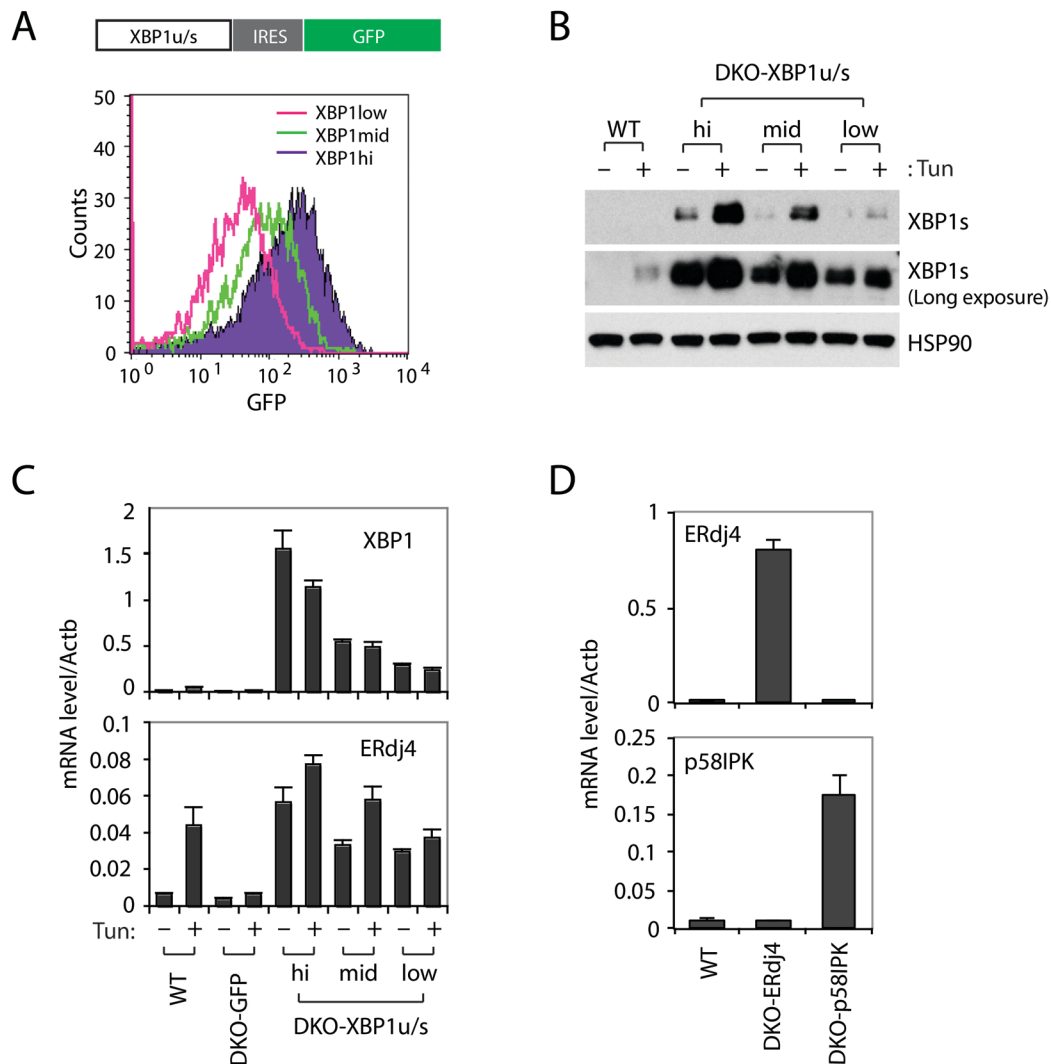

**Figure S7. Effects of XBP1 and its target genes on PC1 autoproteolytic cleavage in DKO-*Pkd1*<sup>F/H</sup>-BAC cells.** (A) The retroviral constructs possess IRES-GFP as a marker. DKO-*Pkd1*<sup>F/H</sup>-BAC cells were infected with XBP1s retrovirus at varying doses. GFP levels were determined by FACS analysis. (B) XBP1s protein levels were determined by immunoblotting in cell lines, each expressing a different level of XBP1s. (C) XBP1 and ERdj4 mRNA levels were determined by quantitative RT-PCR. (D) DKO-*Pkd1*<sup>F/H</sup>-BAC cells were infected with ERdj4 or p58IPK retroviruses. The transgene expression was examined by quantitative RT-PCR.

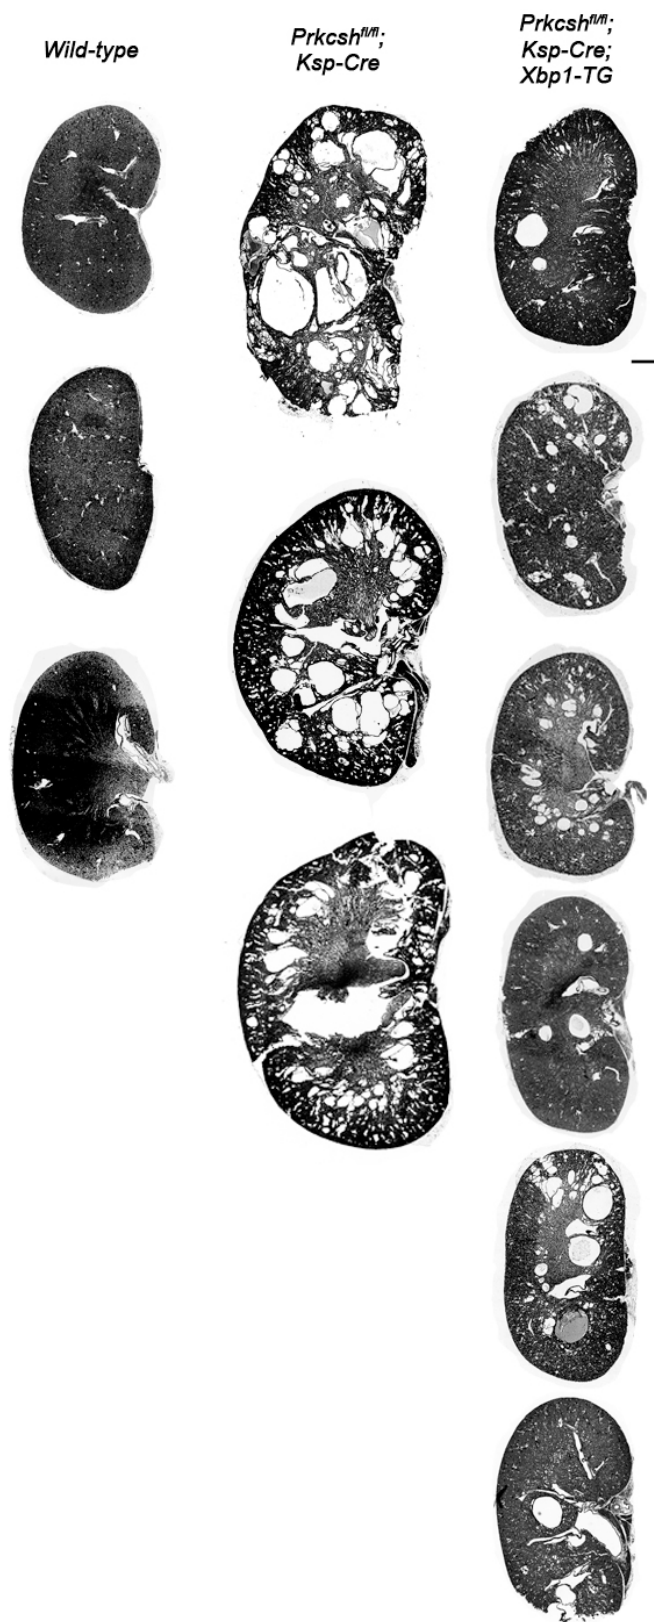

**Figure S8. Kidney sections stained with hematoxylin and eosin.** Images for all of the individual sections used in Figure 6E. Scale bar, 1 mm.

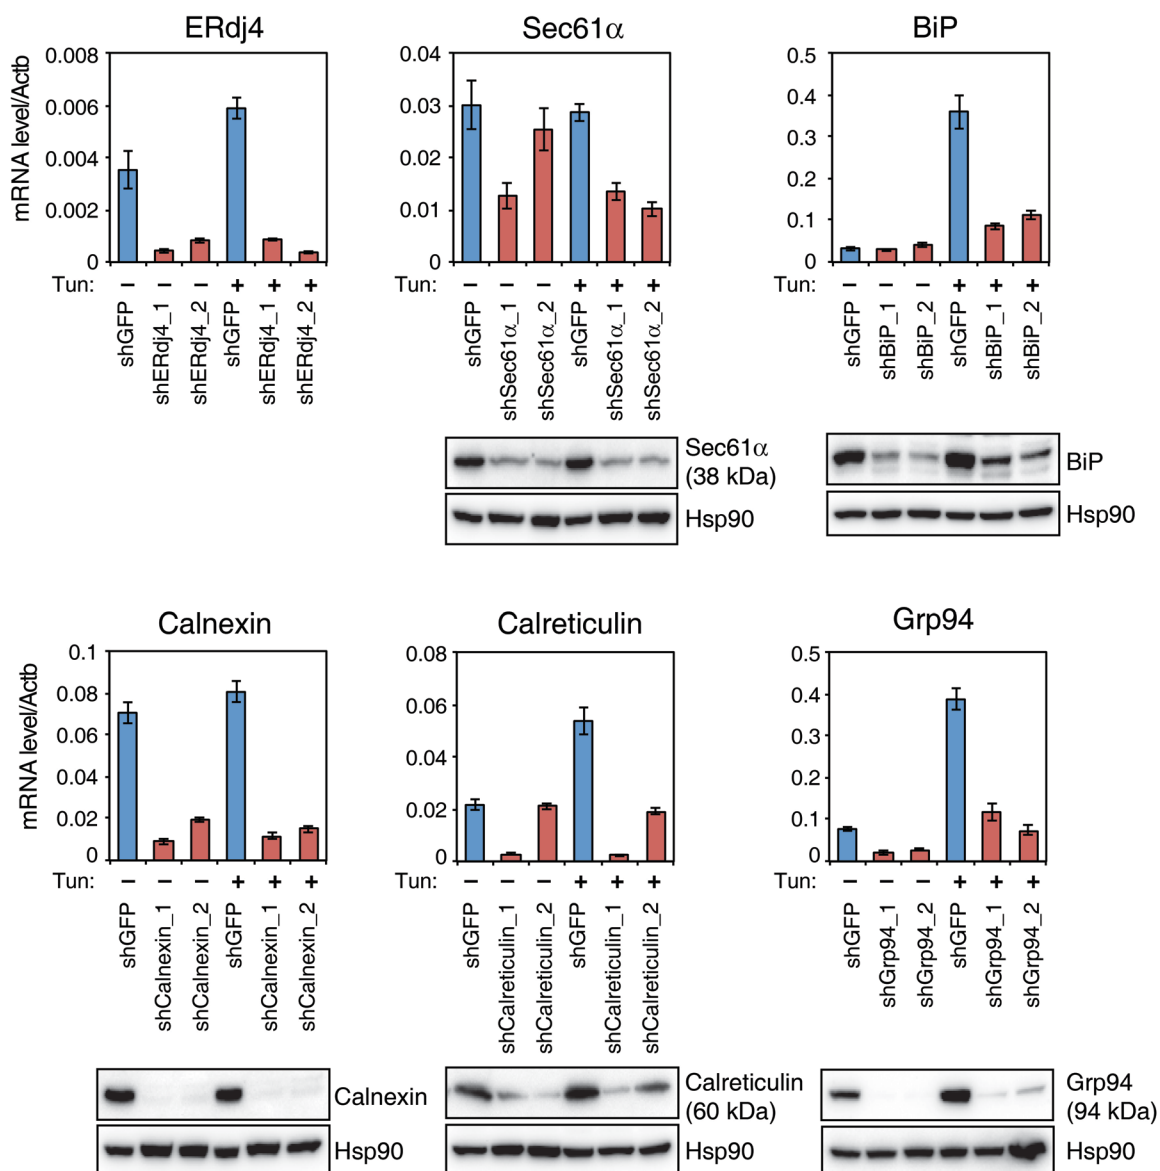

**Figure S9. Assessment of ER chaperone knockdown efficiency.** Total RNA and protein were extracted from DKO-*Pkd1<sup>F/H</sup>*-BAC cells transduced with shRNA lentiviruses. Quantitative RT-PCR and western blotting were performed.



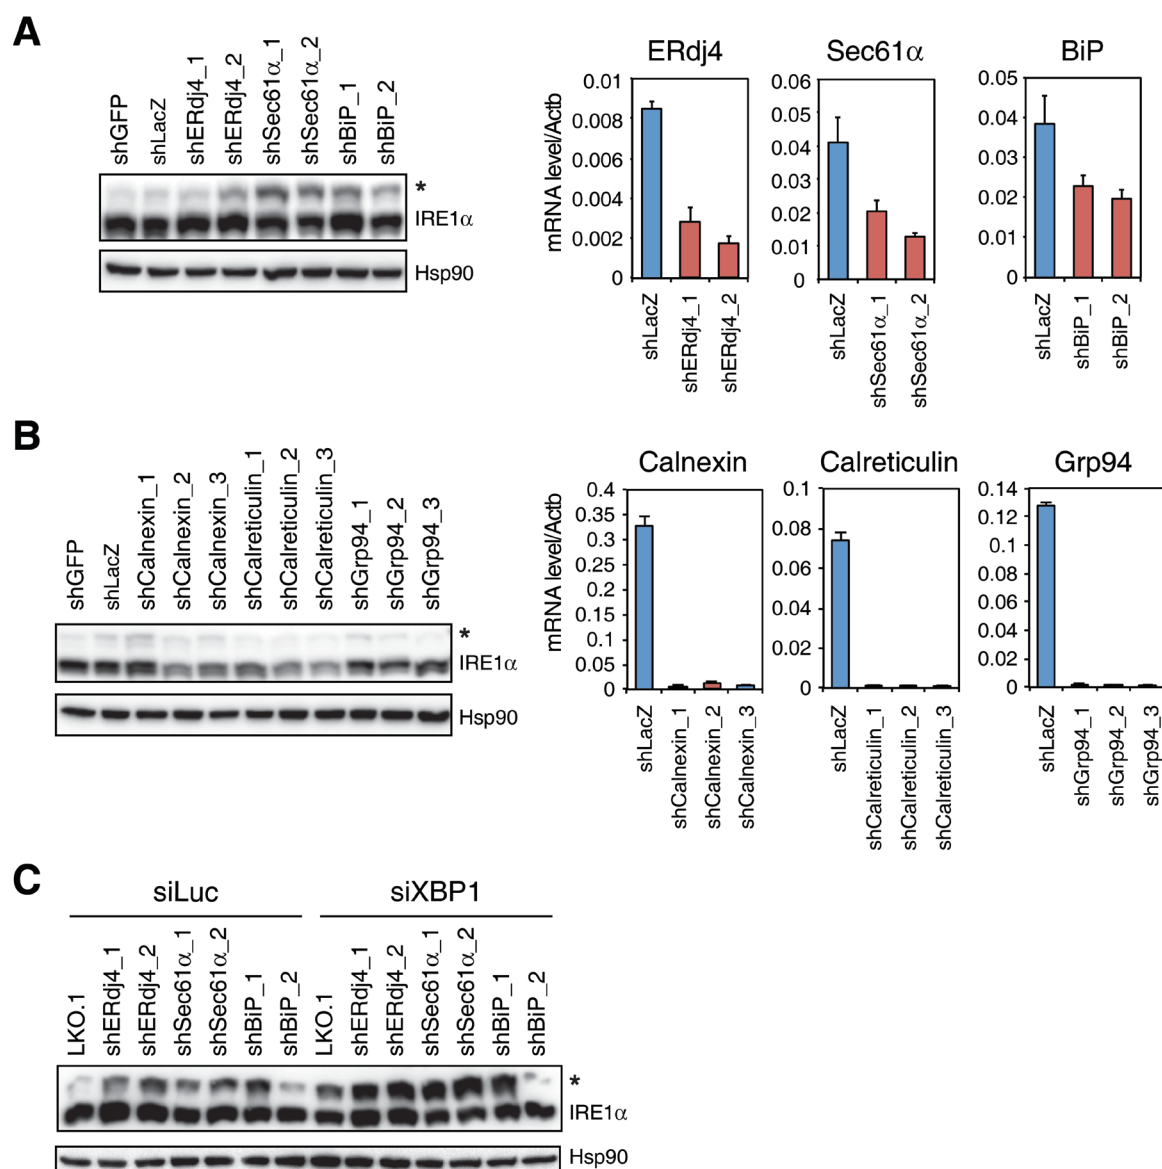

**Figure S11. IRE1α activity in Hepa1-6 cells expressing shRNAs targeting ER chaperones. (A)** Hepa1-6 cells were transduced with lentiviruses expressing shRNAs targeting ERdj4, Sec61α or BiP. IRE1α phosphorylation was assessed by PhosTag western blotting. Knockdown efficiency was measured by quantitative RT-PCR. GFP and LacZ targeting shRNAs were used as controls. **(B)** Effects of calnexin, calreticulin and Grp94 shRNAs on IRE1α activity. **(C)** shRNA-transduced Hepa1-6 cells were transiently transfected with luciferase or XBP1 siRNA. IRE1α phosphorylation was assessed by PhosTag western blotting.
